# Supplementary material for: Superhydrophobic hollow spheres by electrodeposition of fluorinated poly(3,4-ethylenedithiopyrrole)
Source: Royal Society of Chemistry journal article supplement (doi:10.1039/c2ra21665e), 2012-01-01

## **Electronic Supporting Information**

### **Superhydrophobic hollow spheres by electrodeposition of fluorinated poly(3,4-ethylenedithiopyrrole)**

**Herve Bellanger,<sup>a</sup> Thierry Darmanin,<sup>a</sup> Elisabeth Taffin de Givenchy,<sup>a</sup> and Frederic Guittard<sup>\*a</sup>**

## EDTPOH

EIMS ( $m/z$  (%)): 201 ( $M^+$ , 100), 170 ( $C_7H_8NS_2^{+\bullet}$ , 23), 142 ( $C_5H_4NS_2$ , 67).

HB272-02 #1835-1894 RT: 19.64-20.11 AV: 60 SB: 2550 8.71-18.17, 22.62-32.91 NL: 5.65E1  
T: + c Full ms [50.00-450.00]

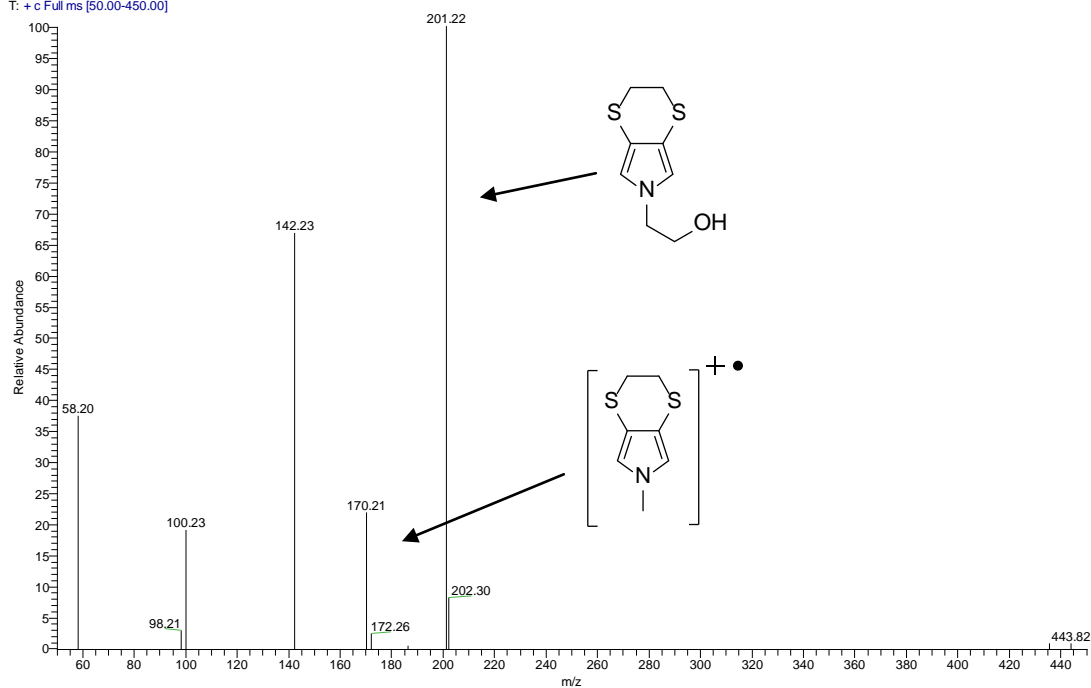

## EDTP-F<sub>8</sub>

EIMS ( $m/z$  (%)): 675 ( $M^+$ , 100), 519.36 ( $C_{13}H_7O_2F_{17}^+$ , 50), 183 ( $C_8H_9NS_2^{+\bullet}$ , 92)

HB-268-01 #1697-1704 RT: 23.29-23.37 AV: 8 SB: 174 22.04-23.21, 23.92-24.58 NL: 3.54E3  
T: + c Full ms [50.00-750.00]

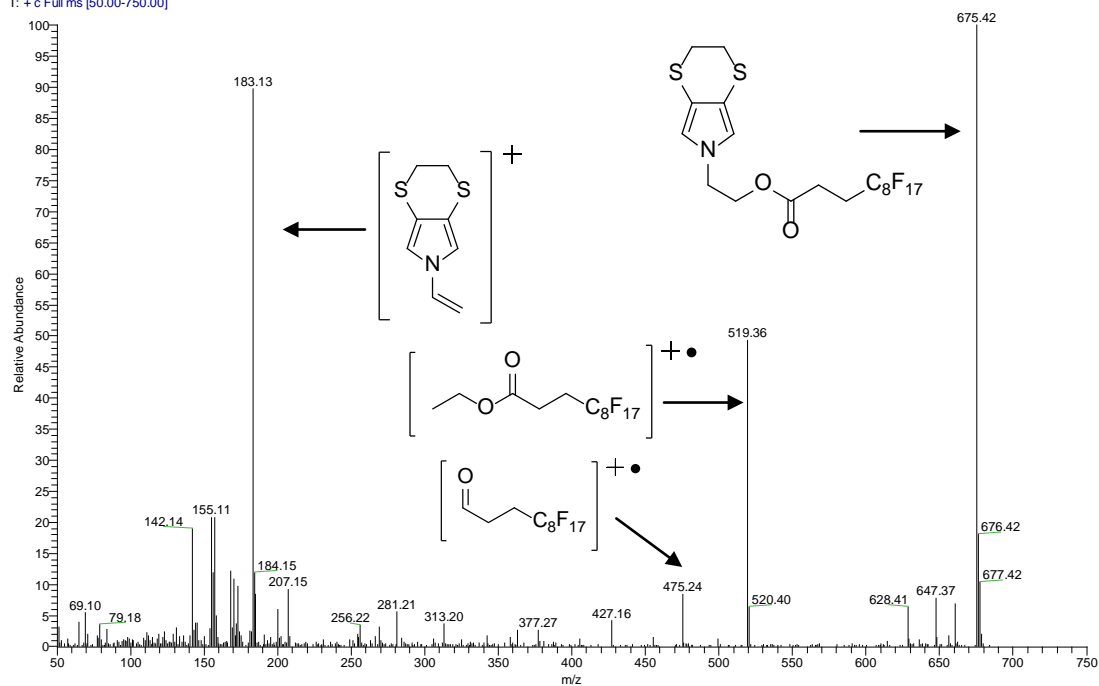

### EDTP-F<sub>6</sub>

EIMS (m/z (%)): 575(M<sup>+</sup>, 100), 419 (C<sub>11</sub>H<sub>7</sub>O<sub>2</sub>F<sub>13</sub><sup>+</sup>, 48), 183 (C<sub>8</sub>H<sub>9</sub>NS<sub>2</sub><sup>+</sup>, 82)

BG\_HB-274-01 #1619-1627 RT: 22.50-22.59 AV: 9 SB: 260 20.60-22.10, 24.18-25.43 NL: 1.11E3  
T: + c Full ms [50.00-750.00]

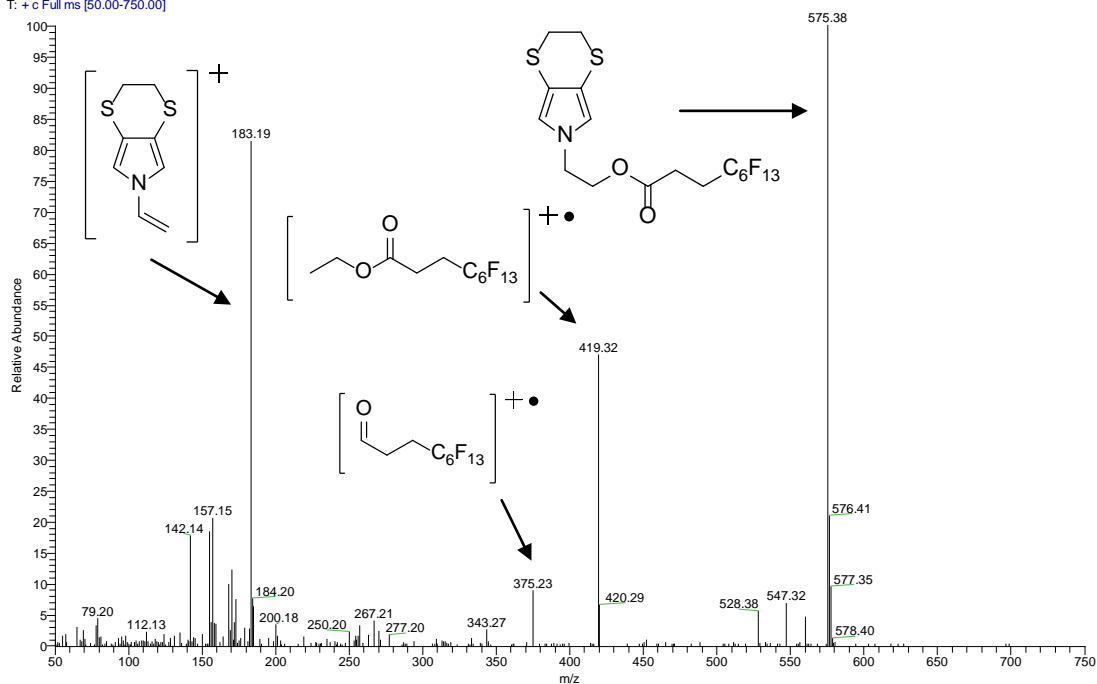

### EDTP-F<sub>4</sub>

EIMS (m/z (%)): 475 (M<sup>+</sup>, 100), 319 (C<sub>9</sub>H<sub>7</sub>O<sub>2</sub>F<sub>9</sub><sup>+</sup>, 52), 183 (C<sub>8</sub>H<sub>9</sub>NS<sub>2</sub><sup>+</sup>, 42)

BG\_HB-273-01 #1558-1585 RT: 21.84-22.13 AV: 28 SB: 645 18.97-21.62, 23.13-27.35 NL: 1.11E2  
T: + c Full ms [50.00-750.00]

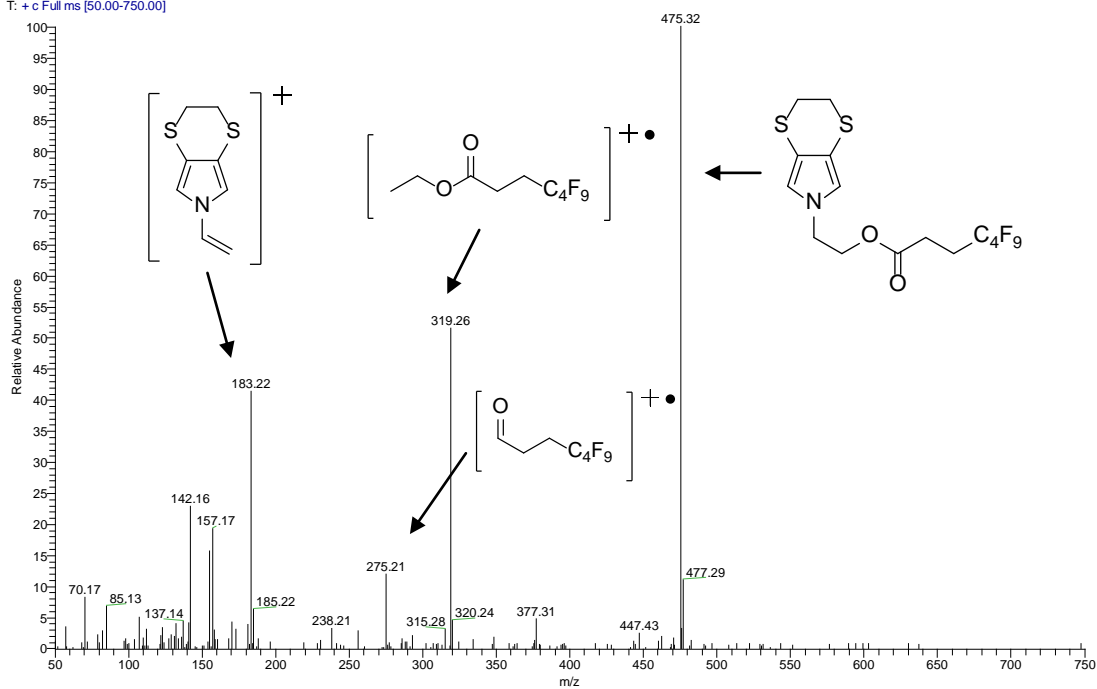

Supplement: c2ra21665e.pdf [file c2ra21665e.pdf]
